# Supplementary material for: Hexagonal VO2 particles: synthesis, mechanism and thermochromic properties
Source: Royal Society of Chemistry journal article supplement (doi:10.1039/c8ra00716k), 2018-01-01
Supplement: c8ra00716k1.pdf [file c8ra00716k1.pdf]

## Hexagonal VO<sub>2</sub> Particles: Synthesis, Mechanism and Thermochromic Properties

Hui Yan Xu<sup>a,b</sup>, Ke Wei Xu<sup>a,c</sup>, Fei Ma<sup>a,b,\*</sup>, Paul K Chu<sup>b,\*</sup>

*<sup>a</sup> State Key Laboratory for Mechanical Behavior of Materials, Xi'an Jiaotong  
University, Xi'an 710049, Shaanxi, China*

*<sup>b</sup> Department of Physics and Materials Science, City University of Hong Kong, Tat  
Chee Avenue, Kowloon, Hong Kong, China*

*<sup>c</sup> Department of Physics and Opt-electronic Engineering, Xi'an University of Arts and  
Science, Xi'an 710065, Shaanxi, China*

\* Authors to whom correspondence should be addressed.

Electronic mail: [mafei@mail.xjtu.edu.cn](mailto:mafei@mail.xjtu.edu.cn) (F. Ma)

[paul.chu@cityu.edu.hk](mailto:paul.chu@cityu.edu.hk) (P. K. Chu)

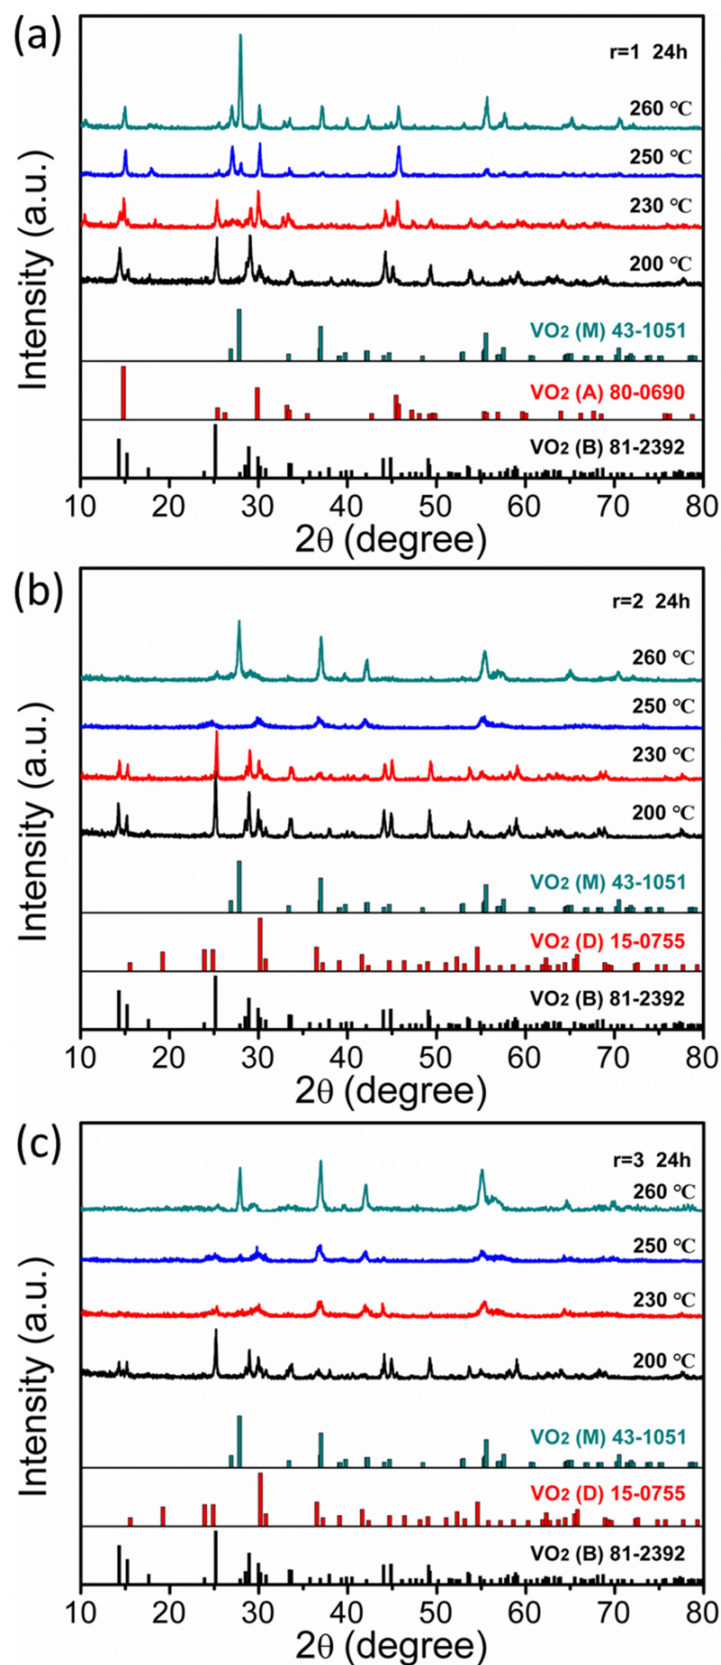

Fig. S1. (Color online) XRD patterns of samples obtained at different temperature and molar ratios (r) between  $\text{H}_2\text{C}_2\text{O}_4$  and  $\text{V}_2\text{O}_5$  for 24 h: (a)  $r=1$ , (b)  $r=2$ , (c)  $r=3$ .

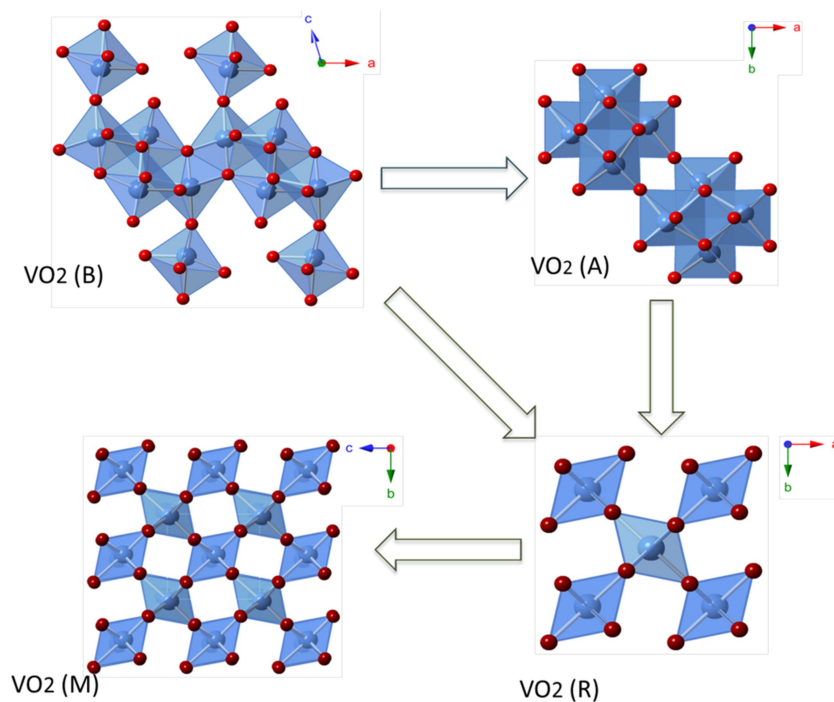

Fig. S2. (Color online) Schematic diagram of phase evolution of VO<sub>2</sub> polymorphs. Blue and red balls represent vanadium and oxygen atoms, respectively.

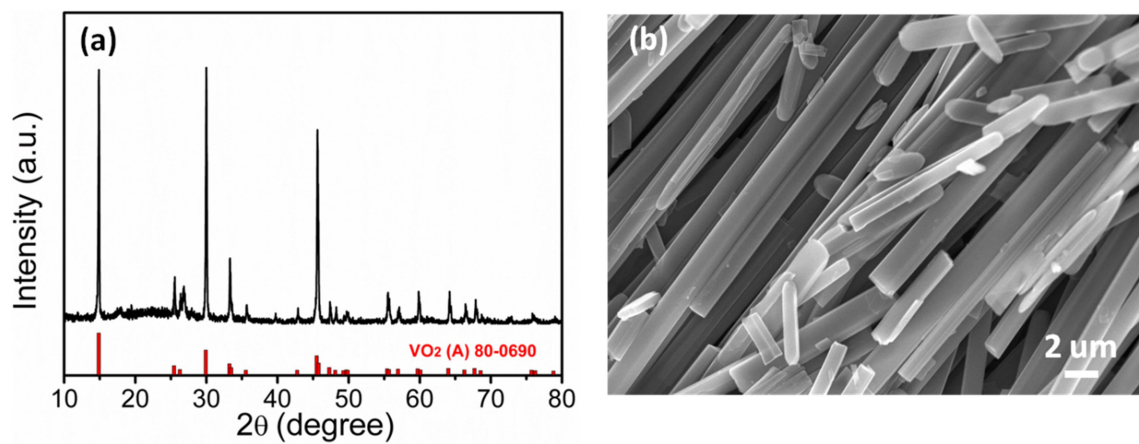

Fig. S3. (Color online) XRD SEM image of pure VO<sub>2</sub> (A).

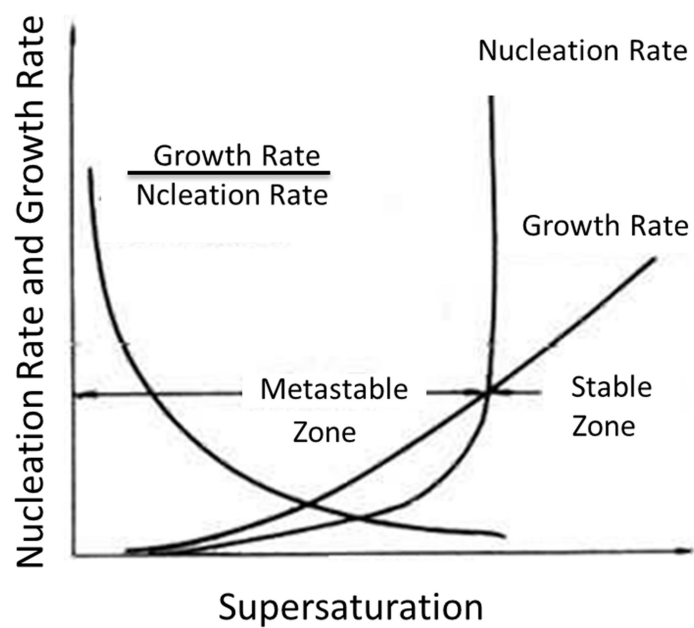

Fig. S4. (Color online) The relationship between supersaturation and crystal growth characterization in hydrothermal process.

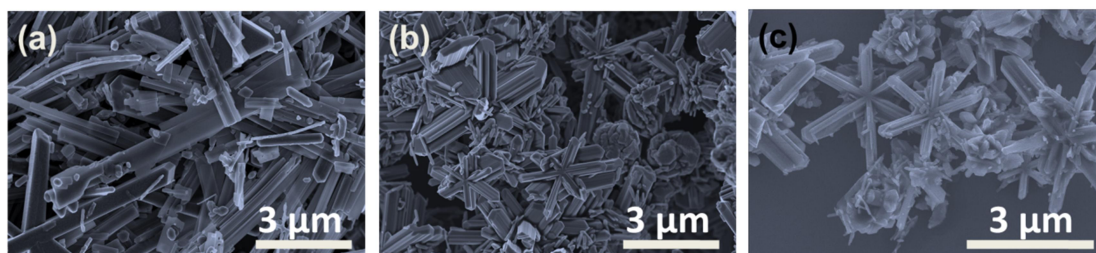

Fig. S5. The SEM images of samples annealed at 450 °C with (a)  $r=1$ , (b)  $r=2$ , (c)  $r=3$ , respectively.

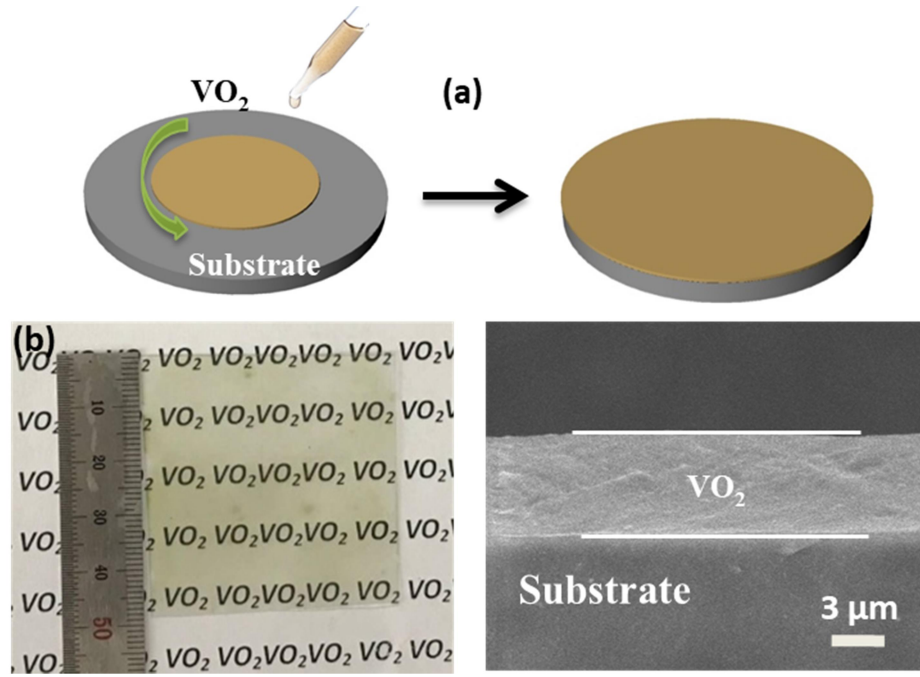

Fig. S6. (a) The fabricating process of  $\text{VO}_2$  film, (b) Photographs of film, (c) the cross-sectional SEM image of the films.
